# Supplementary material
Source: publisher figshare collection journal article supplement (https://frontiersin.figshare.com/ndownloader/files/20794428)
Supplement: Supplementary file [file 20794428]

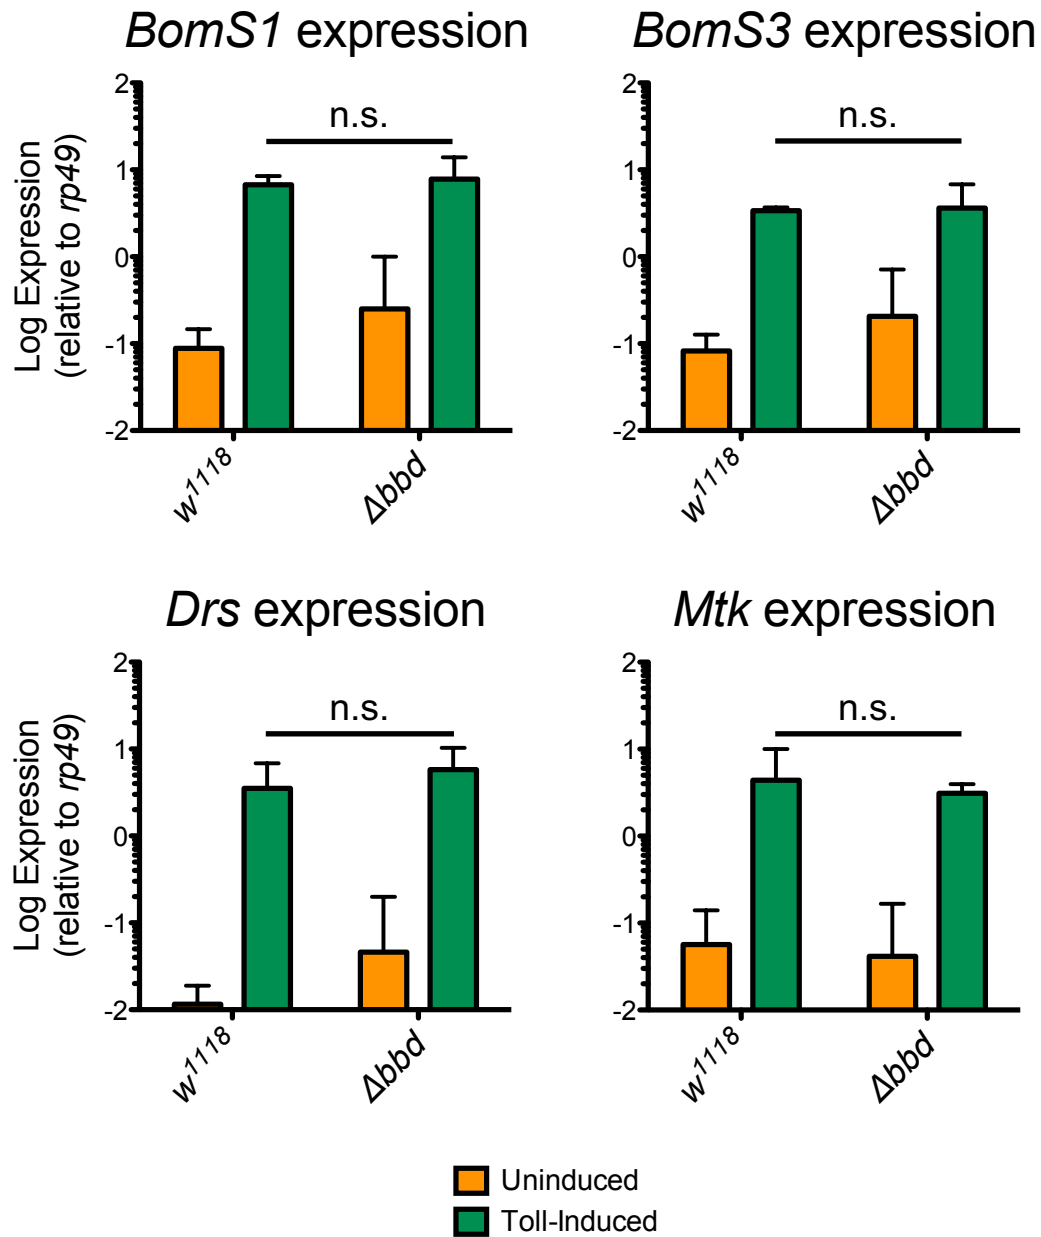

**Supplemental Figure 1.  $\Delta bbd$  deletion does not affect Toll signaling.**

qRT-PCR analysis of uninjured flies and flies 18 hours after challenge with heat-killed *M. luteus*. Gene mRNA levels were calculated relative to levels of *rp49*, a ribosomal gene. Experiments were completed with independent biological triplicates. Two-way ANOVA was calculated followed by Tukey's test, indicating that Toll-induction is a significant variable for differences in mRNA levels, but fly genotype is not a significant variable. Error bars show 95% confidence interval. (n.s. = not significant,  $p > 0.05$ )
